# Supplementary material for: Evaluation of glycol chitosan-graft-carboxymethyl β-cyclodextrin as potential pH-sensitive anticancer drug carrier by surface plasmon resonance
Source: Royal Society of Chemistry journal article supplement (doi:10.1039/c2ay25295c), 2012-01-01
Supplement: c2ay25295c.pdf [file c2ay25295c.pdf]

**Supplementary Information for the following manuscript**

**Newly synthesized glycol chitosan-*graft*-carboxymethyl  $\beta$ -cyclodextrin as potential pH-sensitive anticancer drug carrier**

**Haina Tan,<sup>a</sup> Ying Xue,<sup>a</sup> Qingfen Luan<sup>a</sup> and Xin Yao<sup>\*ab</sup>**

*<sup>a</sup> College of Chemistry and Chemical Engineering, Graduate University of Chinese Academy of Sciences, Beijing 100049, P. R. China*

*<sup>b</sup> State Key Laboratory of Natural and Biomimetic Drugs, Peking University, Beijing 100191, P. R. China*

\* Corresponding author. Tel.: +86 10 88256414; fax: +86 10 88256092.

*E-mail address: yaox@gucas.ac.cn (X. Yao).*

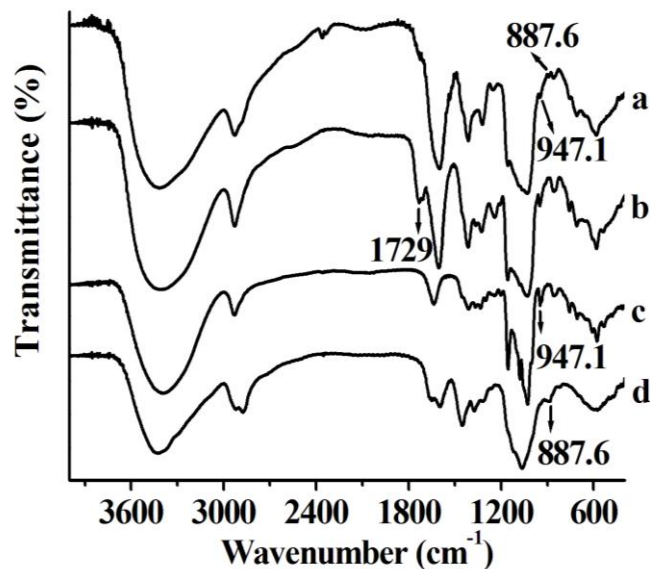

**Fig. S1** FT-IR spectra of (a) GCH-g-CM  $\beta$ -CD, (b) CM  $\beta$ -CD, (c)  $\beta$ -CD, and (d) GCH. The samples were prepared as pellets using spectroscopic grade KBr. In the spectrum of  $\beta$ -CD (curve c), the characteristic peak at  $947.1\text{ cm}^{-1}$  represents  $\alpha$ -pyranyl vibration of  $\beta$ -CD. Comparison with curve c, there is a strong peak at  $1729\text{ cm}^{-1}$  in the spectrum of CM  $\beta$ -CD (curve b), which is ascribed to the stretching vibration of carbonyl group, indicating the carboxymethylation of  $\beta$ -CD was succeeded. The characteristic peak at  $887.6\text{ cm}^{-1}$  represents  $\beta$ -pyranyl vibration of GCH (curve d). In the spectrum of GCH-g-CM  $\beta$ -CD (curve a), there are both characteristic peaks of  $\beta$ -CD ( $947.1\text{ cm}^{-1}$ ) and GCH ( $887.6\text{ cm}^{-1}$ ) and the peak at  $1729\text{ cm}^{-1}$  belonging to the stretching vibration of carbonyl group almost disappeared after reacting with the amino of GCH, so all the results indicate CM  $\beta$ -CD has been grafted onto GCH.

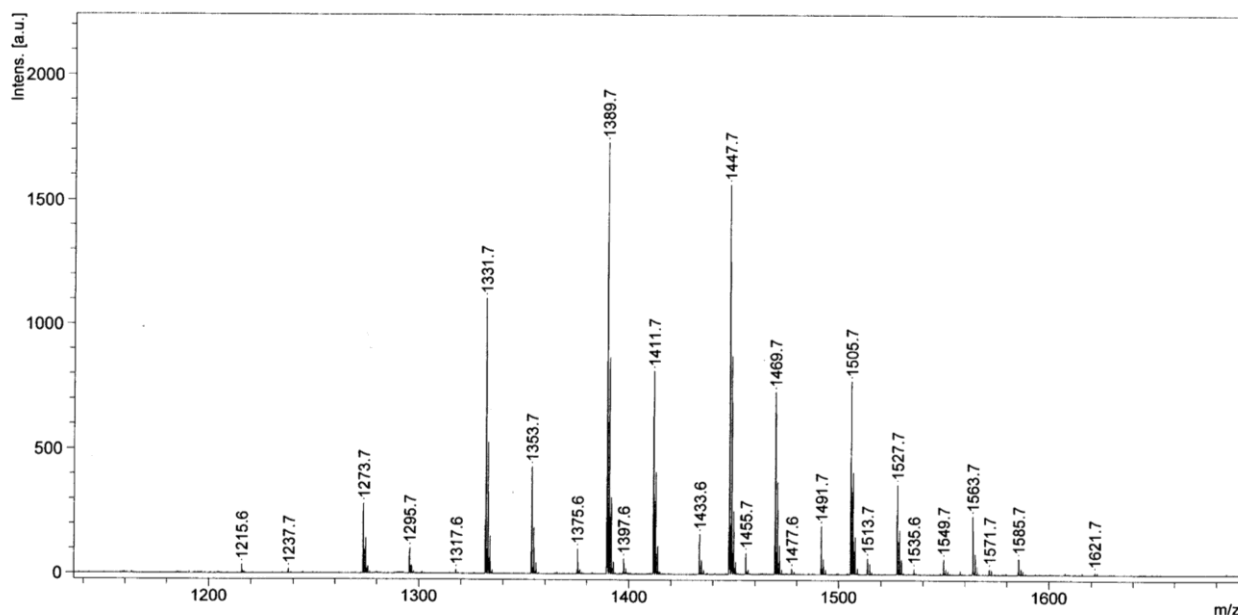

**Fig. S2** MALDI-TOF MS spectra of CM  $\beta$ -CDs. By analyzing the mass to charge ratios ( $m/z$ ), 1215.6  $m/z$  presents  $[\beta\text{-CDNa-CH}_2\text{COOH}]^+$ , 1273.7  $m/z$  presents  $[\beta\text{-CDNa-(CH}_2\text{COOH)}_2]^+$ , 1331.7  $m/z$  presents  $[\beta\text{-CDNa-(CH}_2\text{COOH)}_3]^+$ , 1389.7  $m/z$  presents  $[\beta\text{-CDNa-(CH}_2\text{COOH)}_4]^+$ , 1447.7  $m/z$  presents  $[\beta\text{-CDNa-(CH}_2\text{COOH)}_5]^+$ , 1505.7  $m/z$  presents  $[\beta\text{-CDNa-(CH}_2\text{COOH)}_6]^+$ , and 1563.7  $m/z$  presents  $[\beta\text{-CDNa-(CH}_2\text{COOH)}_7]^+$ .

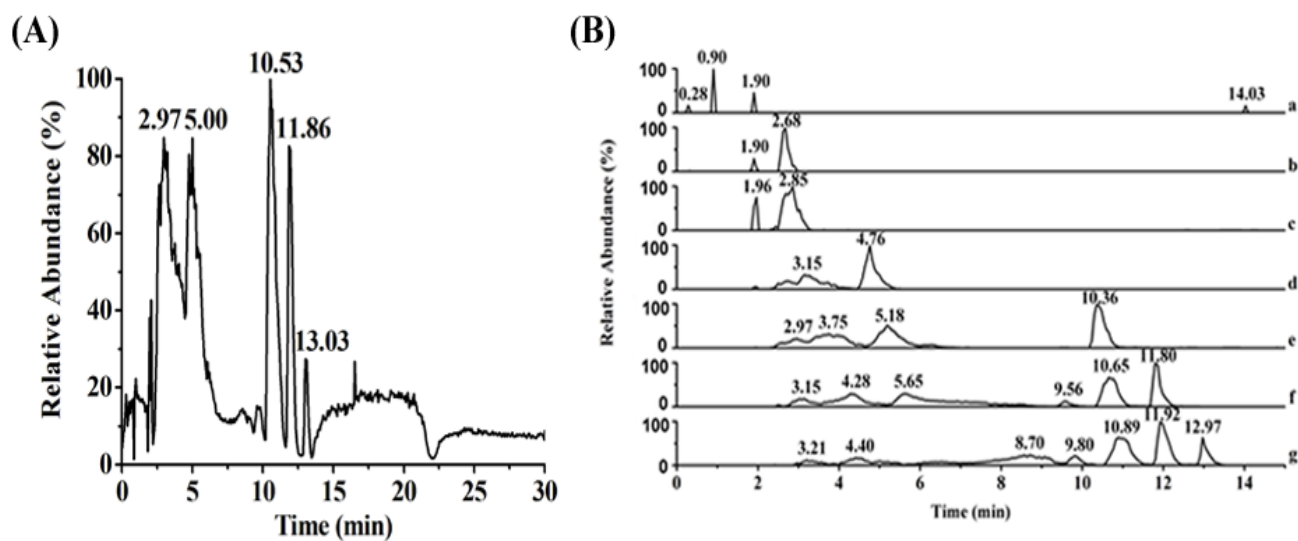

**Fig. S3** (A) Total ion current chromatogram of seven CM  $\beta$ -CD components. (B) The selected ion chromatograms of (a)  $\beta$ -CD-CH<sub>2</sub>COOH,  $m/z$ : 1191.5–1192.5; (b)  $\beta$ -CD-(CH<sub>2</sub>COOH)<sub>2</sub>,  $m/z$ : 1249.5–1250.5; (c)  $\beta$ -CD-(CH<sub>2</sub>COOH)<sub>3</sub>,  $m/z$ : 1307.5–1308.5; (d)  $\beta$ -CD-(CH<sub>2</sub>COOH)<sub>4</sub>,  $m/z$ : 1365.5–1366.5; (e)  $\beta$ -CD-(CH<sub>2</sub>COOH)<sub>5</sub>,  $m/z$ : 1423.5–1424.5; (f)  $\beta$ -CD-(CH<sub>2</sub>COOH)<sub>6</sub>,  $m/z$ : 1481.5–1482.5; (g)  $\beta$ -CD-(CH<sub>2</sub>COOH)<sub>7</sub>,  $m/z$ : 1539.5–1540.5. Conditions: column: Agilent ZORBAX SB-C<sub>18</sub> (2.1×150 mm, 5  $\mu$ m) using Agilent 1100 system; mobile phase: (A) H<sub>2</sub>O, (B) Acetonitrile; gradient: 0–30 min, 10%–90% B; flow rate: 0.2 mL/min. The online identification was performed on electrospray ionization mass spectrometry (ESI-MS): Thermo Finnigan LCQ DECA XP MS. From figure A, it can be seen that there are five main components. From figure B, the peak area of every CM  $\beta$ -CD component and the total peak area can be obtained. The peak area of every CM  $\beta$ -CD component divided by the total peak area is equal to the relative content of every CM  $\beta$ -CD component. The calculated relative contents from  $\beta$ -CD-(CH<sub>2</sub>COOH)<sub>3</sub> to  $\beta$ -CD-(CH<sub>2</sub>COOH)<sub>7</sub> are 2.468%, 16.481%, 33.513%, 28.902%, and 18.266%, respectively.

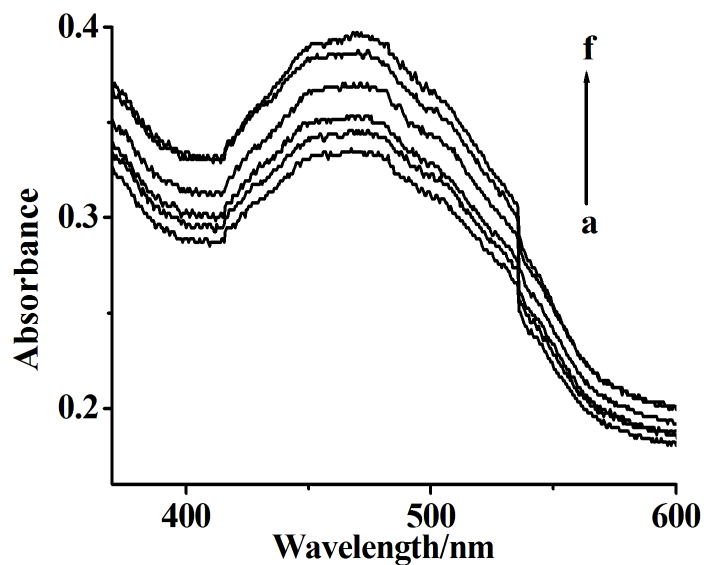

**Fig. S4** UV-vis absorption spectra of DXR-CM  $\beta$ -CD at different molar ratios, and the molar ratios between GCH-g-CM  $\beta$ -CD and DXR are (a) 0:1, (b) 0.25:1, (c) 0.5:1, (d) 2:1, (e) 1.5:1, and (f) 1:1. At the beginning [(a) 0:1, (b) 0.25:1, (c) 0.5:1], the absorbance increased upon addition of GCH-g-CM  $\beta$ -CD, indicating that CM  $\beta$ -CD has formed inclusion complex with DXR through host-guest interaction. Then, the absorbance approaches the maximum when the molar ratio between GCH-g-CM  $\beta$ -CD and DXR is 1:1 (curve f), but the absorbance decreased with continuing to add GCH-g-CM  $\beta$ -CD [curves (e) 1.5:1 and (d) 2:1]. These results indicate that 1:1 is the matching molar ratio, that is to say, one CM  $\beta$ -CD group grafted on GCH binds one molecule of DXR.
